# Supplementary material for: Trends and Patterns of Knee Osteoarthritis in China: A Longitudinal Study of 17.7 Million Adults from 2008 to 2017
Source: MDPI journal article supplement (doi:10.3390/ijerph18168864), 2021-08-23
Supplement: s1 [file s1]

**Supplementary Table S1.** Crude prevalence and incidence of diagnosed knee osteoarthritis in Beijing, China, 2008–2017.

|                                           | 2008                   | 2009                   | 2010                   | 2011                   | 2012                   | 2013                   | 2014                   | 2015                   | 2016                   | 2017                   |
|-------------------------------------------|------------------------|------------------------|------------------------|------------------------|------------------------|------------------------|------------------------|------------------------|------------------------|------------------------|
| Prevalence (%; 95% CI)                    |                        |                        |                        |                        |                        |                        |                        |                        |                        |                        |
| Overall                                   | 1.384<br>(1.377,1.392) | 1.767<br>(1.759,1.775) | 2.649<br>(2.640,2.658) | 3.477<br>(3.468,3.486) | 3.883<br>(3.874,3.892) | 3.853<br>(3.844,3.861) | 4.625<br>(4.616,4.635) | 4.963<br>(4.954,4.972) | 4.497<br>(4.449,4.506) | 4.639<br>(4.631,4.648) |
| Men                                       | 0.796<br>(0.788,0.803) | 1.034<br>(1.026,1.042) | 1.605<br>(1.596,1.614) | 2.139<br>(2.129,2.148) | 2.405<br>(2.396,2.415) | 2.440<br>(2.431,2.450) | 3.066<br>(3.055,3.076) | 3.364<br>(3.354,3.375) | 3.071<br>(3.061,3.081) | 3.213<br>(3.204,3.223) |
| Women                                     | 2.137<br>(2.124,2.150) | 2.702<br>(2.688,2.716) | 3.966<br>(3.951,3.982) | 5.143<br>(5.126,5.159) | 5.702<br>(5.686,5.719) | 5.589<br>(5.573,5.637) | 6.543<br>(6.526,6.560) | 6.930<br>(6.914,6.947) | 6.258<br>(6.243,6.274) | 6.407<br>(6.392,6.422) |
| Incidence (per 1000 person-years; 95% CI) |                        |                        |                        |                        |                        |                        |                        |                        |                        |                        |
| Overall                                   | 12.62<br>(12.55,12.69) | 15.75<br>(15.67,15.82) | 16.34<br>(16.27,16.41) | 21.48<br>(21.40,21.56) | 21.50<br>(21.43,21.57) | 18.45<br>(18.38,18.51) | 22.69<br>(22.62,22.76) | 18.83<br>(18.76,19.21) | 15.37<br>(15.32,15.43) | 14.41<br>(14.37,14.46) |
| Men                                       | 7.31<br>(7.24,7.38)    | 9.63<br>(9.55,9.70)    | 10.43<br>(10.35,10.50) | 14.00<br>(13.92,14.08) | 14.38<br>(14.30,14.45) | 13.06<br>(12.98,13.13) | 17.00<br>(16.92,17.08) | 14.49<br>(14.41,14.56) | 11.88<br>(11.81,11.95) | 11.29<br>(11.23,11.36) |
| Women                                     | 19.41<br>(19.28,19.53) | 23.65<br>(23.51,23.79) | 23.99<br>(23.86,24.11) | 31.13<br>(31.00,31.27) | 30.72<br>(30.59,30.84) | 25.49<br>(25.37,25.61) | 30.19<br>(30.07,30.31) | 24.60<br>(24.49,24.71) | 20.07<br>(19.97,20.17) | 18.64<br>(18.55,18.73) |
